# Supplementary material for: Toxicity and tolerance mechanism of binary zinc oxide nanoparticles and tetrabromobisphenol A regulated by humic acid in Chlorella vulgaris
Source: Royal Society of Chemistry journal article supplement (doi:10.1039/d3em00230f), 2023-01-01
Supplement: d3em00230f1.pdf [file d3em00230f1.pdf]

## Electronic Supplementary Information

### Toxicity and tolerance mechanism of binary zinc oxide nanoparticles and tetrabromobisphenol A regulated by humic acid in *Chlorella* *vulgaris*<sup>†</sup>

Yi Liu,<sup>‡a</sup> Mengen Kang,<sup>‡a</sup> Yuzhu Weng,<sup>a</sup> Yuanyuan Ding,<sup>a</sup> Xue Bai<sup>a,b,\*</sup>

<sup>a</sup>Key Laboratory of Integrated Regulation and Resource Development on Shallow  
Lake of Ministry of Education, College of Environment, Hohai University, Nanjing

210098, China

<sup>b</sup>Yangtze Institute for Conservation and Development, Hohai University, Nanjing

210098, China

\*Corresponding author: Xue Bai;

Address: Xikang Road No.1, Gulou District, Nanjing, China, 210098

(College of Environment, Hohai University, Nanjing);

Email: [baixue@hhu.edu.cn](mailto:baixue@hhu.edu.cn)

<sup>†</sup> Electronic supplementary information (ESI) available.

<sup>‡</sup> Y. Liu and M. Kang contributed equally to this work.

## 1 **Text S1 Characterization of pristine zinc oxide nanoparticles (ZnO NPs)**

2       Based on the scanning electron microscopy (SEM) image (Fig. S1a), the pristine  
3 ZnO NPs had a slightly regular spherical morphology with uniformly dispersed  
4 particles in the range of 20–40 nm in size. In contrast, Transmission electron  
5 microscopy (TEM) images (Fig. S1b) revealed that ZnO NPs were aggregated into  
6 irregular shapes in the algae culture medium. Additionally, XRD (Fig. S1c) showed  
7 that the presence of peaks at  $2\theta = 1.74^\circ$ ,  $34.49^\circ$  and  $36.38^\circ$  respectively corresponded  
8 to the (100), (002) and (101) diffraction planes of the hexagonal wurtzite structure  
9 (JCPDS file No. 36–1451) belonging to  $P6_3mc$  space group.

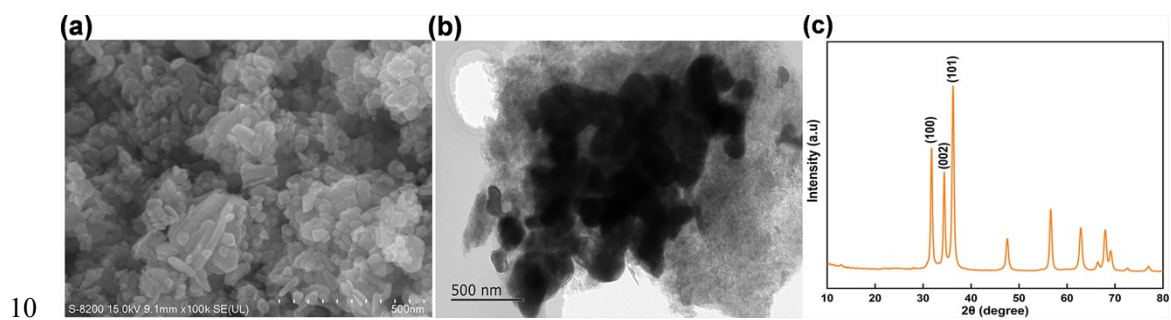

11 **Fig. S1** The characterization of ZnO NPs. SEM image of pristine ZnO NPs (a), TEM image of  
 12 ZnO NPs in the culture with algae (b), and XRD patterns of pristine ZnO NPs (c).

13

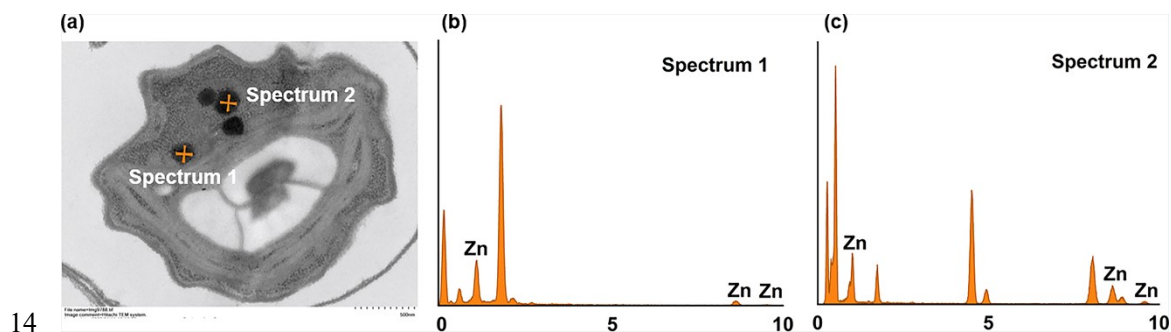

15 **Fig. S2** Bio-TEM and EDS of dense aggregates in the ZnO-TBBPA (8) treatment.

16 **Table S1** The medium of BG-11 culture.

| Macronutrient                                         | Concentrations<br>(g/L) | Macronutrient                                       | Concentrations<br>(g/L) |
|-------------------------------------------------------|-------------------------|-----------------------------------------------------|-------------------------|
| NaNO <sub>3</sub>                                     | 1.5                     | H <sub>3</sub> BO <sub>3</sub>                      | 2.86                    |
| MgSO <sub>4</sub> • 7H <sub>2</sub> O                 | 0.037                   | MnCl <sub>2</sub> • 4H <sub>2</sub> O               | 1.81                    |
| CaCl <sub>2</sub> • 7H <sub>2</sub> O                 | 0.036                   | ZnSO <sub>4</sub> • 7H <sub>2</sub> O               | 0.22                    |
| K <sub>2</sub> HPO <sub>4</sub> • 5H <sub>2</sub> O   | 0.054                   | CuSO <sub>4</sub> • 5H <sub>2</sub> O               | 0.0079                  |
| NaCO <sub>3</sub>                                     | 0.054                   | Na <sub>2</sub> MO <sub>4</sub> • 2H <sub>2</sub> O | 0.0009                  |
| Co(NO <sub>3</sub> ) <sub>2</sub> • 2H <sub>2</sub> O | 0.0094                  | Na <sub>2</sub> EDTA                                | 0.01                    |
| Ammonium ferric citrate                               | 0.006                   | Citric acid                                         | 0.006                   |
